# Supplementary material for: Transcriptome of the pygmy grasshopper Formosatettix qinlingensis (Orthoptera: Tetrigidae)
Source: PeerJ. 2023 Mar 30;11:e15123. doi: 10.7717/peerj.15123 (PMC10066883; doi:10.7717/peerj.15123)
Supplement: Supplemental Information 5 — DEUs are marked in red. [file peerj-11-15123-s005.xlsx]

## Sheet: Sheet1
Table S2 F. qinlingensis transcriptome proteins and reciprocal BLAST hit (RBH) results for identification of pigment, immunity and insecticide resistance genes. Note. DEUs are marked in red.
	Gene symbol	Gene/product name	TBLASTN best hit unigenes	Swissport best hit species	Swissport E -value	Identity	Nr best hit species	Nr E -value	Identity	up/down	log2Fq_FPKM/Fq_FPKM	FDR
pigment
pteridine
	PTR1	Pteridine reductase 1	Unigene_15756	Leishmania major	6.80494e-15	0.344		4.60686e-54	0.6866		1.33884	0.695877
	se	Pyrimidodiazepine synthase	Unigene_63500	Drosophila melanogaster (Fruit fly)	1.8928e-10	0.4051		1.47461e-14	0.4725		0.38086	1
	qdpr	Dihydropteridine reductase	Unigene_04477	Dictyostelium discoideum (Slime mold)	1.83898e-42	0.4311		2.67113e-140	0.7622		0.300609	1
melanin
	MRJP5	Major royal jelly protein 5	Unigene_45677	Apis mellifera (Honeybee)	8.39055e-12	0.251		6.12674e-118	0.7301		7.47768	1
	MYO9A	Unconventional myosin-IXa-like isoform X1	Unigene_09571				Camponotus floridanus	4.91036e-33	0.9692		0.999411	1
	y	Protein yellow	Unigene_04424	Drosophila simulans (Fruit fly)	1.80019e-111	0.4337		1.80809e-173	0.5922		-0.641307	0.845254
ommochrome
	st	Protein scarlet	Unigene_03414	Drosophila melanogaster (Fruit fly)	0	0.5228		0	0.6222		-0.359525	1
	E(bx)	Nucleosome-remodeling factor subunit NURF301	Unigene_63427	Drosophila melanogaster (Fruit fly)	3.94629e-11	0.4375		3.69047e-10	0.4		-1.85852	1
	AAEL000428	Tryptophan 2,3-dioxygenase	Unigene_50737	Aedes aegypti	0	0.7342		0	0.8237		0.585819	1
	ap3s1	AP-3 complex subunit sigma	Unigene_52233	Dictyostelium discoideum (Slime mold)	2.3171e-45	0.5329		1.78806e-63	0.5417	down	-7.57276	1.66893e-07
dopamine
	dat-1	Sodium-dependent dopamine transporter	Unigene_08560	Caenorhabditis elegans	0	0.5602		0	0.8174		0.480032	1
	SCOP1	Rhodopsin, GQ-coupled	Unigene_48825	Mizuhopecten yessoensis	1.27195e-18	0.2647		0	0.8971		0.480895	1
	N/A	Octopamine receptor 1	Unigene_21330	Lymnaea stagnalis	2.59219e-17	0.3333		2.06226e-172	0.8039		0.0752352	1
	dat-1	Sodium-dependent dopamine transporter	Unigene_48737	Caenorhabditis elegans	0	0.5602		0	0.8174		-0.868676	1
	Dop1R2	Dopamine receptor 2	Unigene_45384	Drosophila melanogaster (Fruit fly)	6.96825e-07	0.6552		1.33487e-10	0.9655			0.695877
	SCOP1	Rhodopsin, GQ-coupled	Unigene_07605	Mizuhopecten yessoensis	1.29129e-15	0.2434		6.63252e-170	0.8071		0.269479	1
	Dop1R1	Dopamine receptor 1	Unigene_15484	Drosophila melanogaster (Fruit fly)	1.8797e-50	0.6719		3.67657e-73	0.5902		-0.469611	1
	Dop2R	Dopamine D2-like receptor	Unigene_36793	Drosophila melanogaster	2.14358e-11	0.7742		2.82015e-15	0.5385			1
optomotor-blind
	bi	Optomotor-blind protein	Unigene_17440	Drosophila melanogaster (Fruit fly)	4.06206e-139	0.925		4.15038e-137	0.925		-0.145587	1
hedgehog
	iHog	Interference hedgehog	Unigene_29912	Drosophila sechellia (Fruit fly)	3.54338e-79	0.3084		4.96237e-162	0.4197		0.0260744	1
	hh	Protein hedgehog	Unigene_45907	Drosophila willistoni (Fruit fly)	9.34096e-111	0.4987		1.89704e-151	0.632		0.173549	1
	iHog	Interference hedgehog	Unigene_51642	Drosophila sechellia (Fruit fly)	1.66814e-79	0.3099		6.77001e-162	0.4197		-2.05457	0.695877
	hh	Protein hedgehog	Unigene_27695	HH_DROWI	8.21819e-67	0.4558		2.84735e-95	0.5903		1.65798	1
bric-a-brac
	bab1	Protein bric-a-brac 1	Unigene_17532	Drosophila melanogaster (Fruit fly)	3.13379e-39	0.5766		1.62015e-88	0.5517		0.149096	1
	bab1	Protein bric-a-brac 1	Unigene_29671	Drosophila melanogaster (Fruit fly)	5.90088e-41	0.5431		8.92876e-61	0.8319		-1.18383	0.695877
	bab1	Protein bric-a-brac 1	Unigene_13745	Drosophila melanogaster (Fruit fly)	1.85471e-44	0.6435		6.03449e-104	0.8765		-0.101059	1
	bab1	Protein bric-a-brac 1	Unigene_04869	Drosophila melanogaster (Fruit fly)	2.51571e-45	0.6404		2.03621e-112	0.5309	down	-2.86082	2.60068e-05
	bab2	Protein bric-a-brac 2	Unigene_30748	Drosophila melanogaster (Fruit fly)	7.89165e-59	0.8482		4.55307e-176	0.6538		0.17846	1
	bab2	Protein bric-a-brac 2	Unigene_28750	Drosophila melanogaster (Fruit fly)	3.57488e-27	0.5728		1.15577e-153	0.5684		-0.165982	1
	bab2	Protein bric-a-brac 2	Unigene_49620	Drosophila melanogaster (Fruit fly)	1.66225e-09	0.3721		5.58772e-11	0.35		0.171164	1
	bab2	Protein bric-a-brac 2	Unigene_06615	Drosophila melanogaster (Fruit fly)	2.49678e-30	0.5652		1.90772e-138	0.5792		0.0840397	1
	bab2	Protein bric-a-brac 2	Unigene_13021	Drosophila melanogaster (Fruit fly)	5.89012e-31	0.5214		9.1279e-62	0.839		-0.440954	1
	bab2	Protein bric-a-brac 2	Unigene_06659	Drosophila melanogaster (Fruit fly)	1.6043e-30	0.4141		5.74468e-84	0.3824	down	-3.2435	7.53705e-06
	bab2	Protein bric-a-brac 2	Unigene_07587	Drosophila melanogaster (Fruit fly)	4.64016e-36	0.5859		1.05677e-91	0.5383		0.381113	1
doublesex
	dsx	Protein doublesex	Unigene_07876	Drosophila melanogaster (Fruit fly)	3.49368e-18	0.8444		7.40375e-18	0.7222		1.01967	0.695877
decapentaplegic
	dpp	Protein decapentaplegic	Unigene_19728	Drosophila melanogaster (Fruit fly)	4.81665e-36	0.3097		4.43867e-111	0.4875		-0.675178	1
	dpp	Protein decapentaplegic	Unigene_02610	Drosophila pseudoobscura pseudoobscura (Fruit fly)	4.83735e-22	0.4932		2.0133e-22	0.5062		1.44314	0.695877
	dpp	Protein decapentaplegic	Unigene_25199	Drosophila pseudoobscura pseudoobscura (Fruit fly)	6.57664e-31	0.5102		8.1002e-54	0.4978		-0.406902	1
	dpp	Protein decapentaplegic	Unigene_08631	Drosophila pseudoobscura pseudoobscura (Fruit fly)	4.14389e-105	0.52		1.45983e-105	0.5081		0.0181448	1
Immunity
CTL
	ctl-2	Peroxisomal catalase 1	Unigene_06903	Caenorhabditis elegans	2.9737e-135	0.5364		2.17916e-137	0.5636		0.442543	1
	ctl-2	Peroxisomal catalase 1	Unigene_01683	Caenorhabditis elegans	7.24521e-95	0.519		1.01523e-92	0.519		-1.70652	1
SOD
	SOD	Superoxide dismutase [Cu-Zn]	Unigene_23196	Haemonchus contortus (Barber pole worm)	5.35437e-29	0.4118		3.81152e-89	0.5875		1.23637	0.695877
	SOD	Superoxide dismutase [Cu-Zn]	Unigene_07177	Haemonchus contortus (Barber pole worm)	4.64869e-39	0.5385		5.6232e-46	0.5353		1.12296	1
Peptidoglycan recognition protein
	PGRP-SC1a	Peptidoglycan-recognition protein SC1a/b	Unigene_04860	Drosophila simulans (Fruit fly)	4.97931e-32	0.3576		1.74999e-51	0.4914		-0.716911	1
	PGRP-SC1a	Peptidoglycan-recognition protein SC1a/b	Unigene_02462	Drosophila simulans (Fruit fly)	3.35454e-12	0.4023		2.05611e-21	0.3009		0.404701	1
	PGRP-LB	Peptidoglycan-recognition protein LB	Unigene_05830	Drosophila melanogaster (Fruit fly)	3.58706e-64	0.5542		1.07837e-73	0.6294		-0.763925	1
	PGRP-SC2	Peptidoglycan-recognition protein SC2	Unigene_13506	Drosophila simulans (Fruit fly)	3.46491e-49	0.4785		1.91771e-71	0.6503		4.01674	1
Apolipophorin
	N/A	Apolipophorins	Unigene_12065	Locusta migratoria (Migratory locust)	3.76692e-98	0.2646		0	0.4814		0.643036	1
	N/A	Apolipophorins	Unigene_27181	Locusta migratoria (Migratory locust)	0	0.4573		0	0.4573		2.38872	0.695877
	N/A	Apolipophorins	Unigene_51859	Locusta migratoria (Migratory locust)	3.21972e-98	0.2646		0	0.4649		2.38086	1
	N/A	Apolipophorins	Unigene_20529	Locusta migratoria (Migratory locust)	6.62736e-56	0.2953		0	0.3441		0.65021	1
	N/A	Apolipophorins	Unigene_46577	Locusta migratoria (Migratory locust)	0	0.4578		0	0.4578		1.47322	1
